# Supplementary material
Source: Springer Nature journal article supplement (https://www.springermedizin.de/resource/supplementary/12872_2013_648_MOESM2_ESM.pdf/9430194)

Serum  
Uric Acid,  
 $\mu\text{mol/l}$

■ Serum Uric Acid, Men  
■ Serum Uric Acid, Women

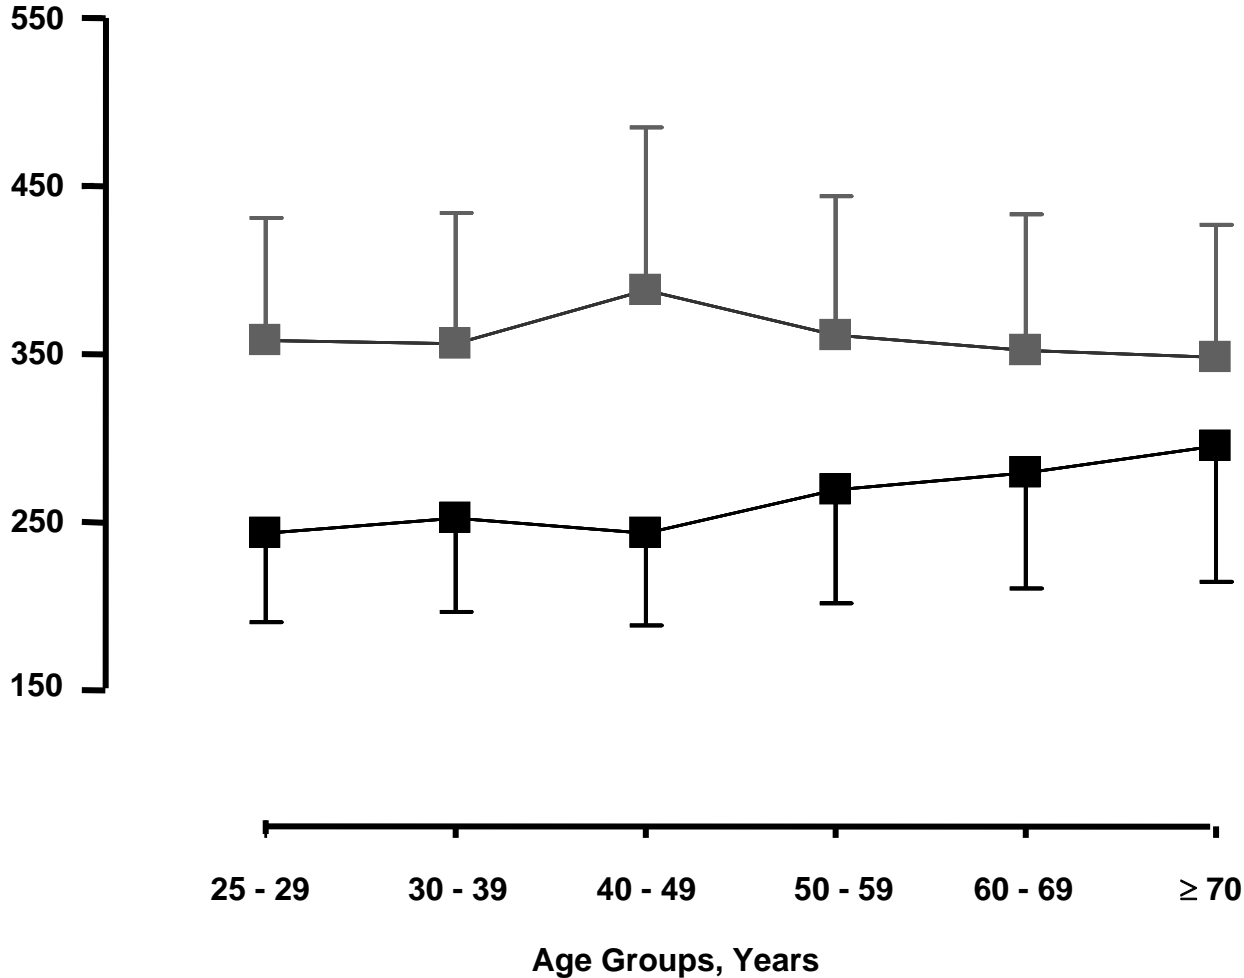

Supplement: MOESM2 [file 9430194]
